# Supplementary material for: Chloroplast proteome response to drought stress and recovery in tomato (Solanum lycopersicum L.)
Source: PubMed Central journal article supplement (PMC5301458; doi:10.1186/s12870-017-0971-0), 2017-02-10
Supplement: 12870_2017_971_MOESM1_ESM.pdf [file 12870_2017_971_MOESM1_ESM.pdf]

**Table S1.** Nucleotide sequence of primers used for qRT-PCR analyses.

| Gene <sup>a</sup>  | Forward (5'→3')            | Reverse (5'→3')            | References       |
|--------------------|----------------------------|----------------------------|------------------|
| <i>abi4</i>        | GTGGTAGATCCTATGACTGTTGAC   | CGACAAGTTCAGAATCCAAGTC     | [1, 2]           |
| <i>abp19a-like</i> | CAGGTGTCAATGGGCTTGGGA      | TAAAGCACCTCCGATGCTCC       | This work        |
| <i>apx2</i>        | TCAGGATTTGAGGGAGCATGGA     | TTTGTCTGATGGTAGCTGGAGGAG   | [3]              |
| <i>apx-tl29</i>    | CCTGATCCAGAGGGAAGGGT       | TAAGTACGAGGGCCCAAAC        | [4]              |
| <i>cpn60a</i>      | AAGGCATTAGTAGCTCCGGC       | CCCATCTTCCATTTGCTGCC       | This work        |
| <i>Cu-Zn sod</i>   | TTGGACGAGCACTTGTGGTT       | CCAATCGTCCACCAGCATTG       | This work        |
| <i>ef-1a</i>       | CTCCATTGGGTCGTTTTGCT       | GGTCACCTTGGCACCAGTTG       | Internal control |
| <i>fc1</i>         | GGTCGTGTTCTGCTCTGAATTG     | GTGCCAGTGGACGTTGACATT      | [5]              |
| <i>fish2</i>       | CGGTCTAACGGAGGAATGGG       | ACACCAGTGTTTGGCTCCAT       | [4]              |
| <i>fish-like</i>   | GCACTTGGTGGAAAGAGTTGC      | CCTTGCCACTCGTGAGACTT       | [4]              |
| <i>glk2</i>        | GTACCAGGCACTCCTTGTTT       | CAGAGGCAACTGTGTCAACT       | [6]              |
| <i>gun1</i>        | CATGGACTTCTCATGGGGCA       | TGCCACAGCATGTCAGTCAA       | [7]              |
| <i>lea</i>         | CGAAGGAGAAGGCTAGTGGA       | AACAAGTGAGGAGCATCGCT       | [4]              |
| <i>lhcb1</i>       | ATGCTTGGTGCTCTTGGATG       | TGCCCAAGTAGTCAAGTCCA       | [8, 9]           |
| <i>por</i>         | AGGCTTCTTTTCCCACCATT       | CAGTAGACACCTGATTTTGT       | [4]              |
| <i>ppoF</i>        | AGAACCAGGCATGGGTAATA       | ACCCATGTCTTCACCGTGTC       | [4]              |
| <i>psbP6</i>       | CAAACAGTGGGCATCATCACAGA    | GGCACTCACTCTATGTAAGGGAAGA  | This work        |
| <i>psbQ</i>        | GCCAAGGAGATTGTTAGTGTCAAGGA | AAGGTCATAGCGAAGGTATTCTGC   | This work        |
| <i>ptm</i>         | TCAGAGGTCACCAGAGAAACCA     | CCCATACAGGAAGGAGAGTCAGTAA  | [10]             |
| <i>rbcL</i>        | CTGCGAATCCCTCCTGCTTA       | CCAACAGGGGACGACCATAAC      | This work        |
| <i>rpoA</i>        | TAAGTCCGAAAGAAGCACTT       | AGGAACCGTGTGTTGATTGTCC     | [11]             |
| <i>rpoB</i>        | TGTATCCGCGGGATTAATTTGGA    | ATCAAGGTTCAAGTTTTCGGTTCA   | [11]             |
| <i>rpoC1</i>       | AGAGCCGATTGTATGGGAAA       | GCTGGAATGCCTGTATGCCTAATC   | [11]             |
| <i>rpoC2</i>       | GAGGGTTGAGGGTTGGAACAAA     | TTAACCAAAGAGATTCGGCT       | [11]             |
| <i>rsh2</i>        | AGCACAATGAACTGTCATCC       | ATAAGAGACAGATCCATCAC       | [12]             |
| <i>rsh3</i>        | GACCGTGAAGGATCTGTTGG       | CTAACTGGTTCGTGGTTCAA       | [12]             |
| <i>sall</i>        | ATGGTGCTTTGTCCCGTGGAGATG   | GCAGCATCTGAGACAACACCT      | [3]              |
| <i>sig5</i>        | GCTCCAGAGGATACCAACAGATGA   | GGCGTGGAGAGAGAAGATAGGTTTAG | [13]             |
| <i>whyl</i>        | AAGGCAGAGTTCGCAGTTCTTG     | GTTTGAGCGACTGGCGTCTT       | [14, 15]         |
| <i>xrn2</i>        | CACAGTAGAGATTATCGTGGTC     | GTGCTGAGGATGACTGGCGTA      | [3]              |
| <i>xrn3</i>        | GTGTATGGGCTCCGCAAGTAAA     | GCCCTCTATCGTTTCTTCTTCTTA   | [3]              |
| <i>zat10</i>       | GCGTTCATAGTGGAAGCGTTGT     | AGGCAGGCATGTTTAGGTCAAAG    | [3]              |

<sup>a</sup> *abi4*: abscisic acid insensitive4; *abp19a-like*: auxin binding protein; *apx-tl29*: ascorbate peroxidase (TL29); *apx2*: cytosolic ascorbate peroxidase; *cpn60a*: Rubisco large subunit-binding protein subunit alpha; *Cu-Zn sod*: superoxide dismutase; *fc1*: ferrochelatase1; *ftsH2* and *ftsH-like*: ATP-dependent zinc metalloprotease FtsH2 and FtsH-like; *glk2*: golden 2-like2; *gun1*: genome uncoupled 1; *lea*: late embryogenesis abundant; *lhcb1*: light harvesting complex b1; *por*: protochlorophyllide reductase; *ppoF*: polyphenol oxidase F; *psbP*: psbP domain-containing protein 6; *psbQ*: photosystem II oxygen-evolving complex protein 3; *ptm*: chloroplast envelope-bound plant homeodomain; *rbcL*: ribulose-1,5-bisphosphate carboxylase/oxygenase large subunit; *rpoA*, *rpoB*, *rpoC1*, *rpoC2*: subunits of Plastid-Encoded RNA Polymerase; *rsh2*, *rsh3*: relA/spoT homolog 2; *sall1*: 3'(2'),5'-bisphosphate nucleotidase; *sig5*: sigma factor 5; *why1*: whirly; *xrn2*, *xrn3*: 5'-3' exoribonuclease 2 and 3; *zat10*: C2H2 zinc finger transcription factor ZAT10.

## References

1. Zhang ZW, Feng LY, Cheng J, Tang H, Xu F, Zhu F, Zhao ZY, Yuan M, Chen YE, Wang JH et al. The roles of two transcription factors, ABI4 and CBFA, in ABA and plastid signalling and stress responses. *Plant Mol Biol.* 2013; 83(4-5):445-458.
2. León P, Gregorio J, Cordoba E. ABI4 and its role in chloroplast retrograde communication. *Front Plant Sci.* 2012; 3:304.
3. Estavillo GM, Crisp PA, Pornsiriwong W, Wirtz M, Collinge D, Carrie C, Giraud E, Whelan J, David P, Javot H et al. Evidence for a SAL1-PAP chloroplast retrograde pathway that functions in drought and high light signaling in Arabidopsis. *Plant Cell* 2011; 23(11):3992-4012.
4. Iovieno P, Punzo P, Guida G, Mistretta C, Van Oosten MJ, Nurcato R, Bostan H, Colantuono C, Costa A, Bagnaresi P et al. Transcriptomic changes drive physiological responses to progressive drought stress and rehydration in tomato. *Front Plant Sci.* 2016; 7:371.
5. Woodson JD, Perez-Ruiz JM, Chory J. Heme synthesis by plastid ferrochelatase I regulates nuclear gene expression in plants. *Curr Biol.* 2011; 21(10):897-903.
6. Waters MT, Wang P, Korkaric M, Capper RG, Saunders NJ, Langdale JA. GLK transcription factors coordinate expression of the photosynthetic apparatus in Arabidopsis. *Plant Cell* 2009; 21(4):1109-1128.

7. Koussevitzky S, Nott A, Mockler TC, Hong F, Sachetto-Martins G, Surpin M, Lim IJ, Mittler R, Chory J. Signals from chloroplasts converge to regulate nuclear gene expression. *Science* 2007; 316(5825):715-719.
8. Tiller N, Bock R. The translational apparatus of plastids and its role in plant development. *Molecular Plant* 2014, 7(7):1105-1120.
9. Zhang ZW, Zhang GC, Zhu F, Zhang DW, Yuan S. The roles of tetrapyrroles in plastid retrograde signaling and tolerance to environmental stresses. *Planta* 2015; 242(6):1263-1276.
10. Sun X, Feng P, Lu C, Xu X, Zhang L. A chloroplast envelope-bound PHD transcription factor mediates chloroplast signals to the nucleus. *Nat Comm.* 2011; 2:477.
11. Yamburenko MV, Zubo YO, Vankova R, Kusnetsov VV, Kulaeva ON, Borner T. Abscisic acid represses the transcription of chloroplast genes. *J Exp Bot.* 2013; 64(14):4491-4502.
12. Yamburenko MV, Zubo YO, Borner T. Abscisic acid affects transcription of chloroplast genes via protein phosphatase 2C-dependent activation of nuclear genes: repression by guanosine-3-5-bisdiphosphate and activation by sigma factor 5. *Plant J.* 2015; 82(6):1030-1041.
13. Woodson JD, Perez-Ruiz JM, Schmitz RJ, Ecker JR, Chory J. Sigma factor-mediated plastid retrograde signals control nuclear gene expression. *Plant J.* 2013; 73(1):1-13.
14. Foyer CH, Karpinska B, Krupinska K. The functions of WHIRLY1 and REDOX-RESPONSIVE TRANSCRIPTION FACTOR 1 in cross tolerance responses in plants: a hypothesis. *Philos Trans R Soc Lond B Biol Sci.* 2014;369:20130226.
15. Isemer R, Krause K, Grabe N, Kitahata N, Asami T, Krupinska K. Plastid located WHIRLY1 enhances the responsiveness of Arabidopsis seedlings toward abscisic acid. *Front Plant Sci.* 2012; 3:283.

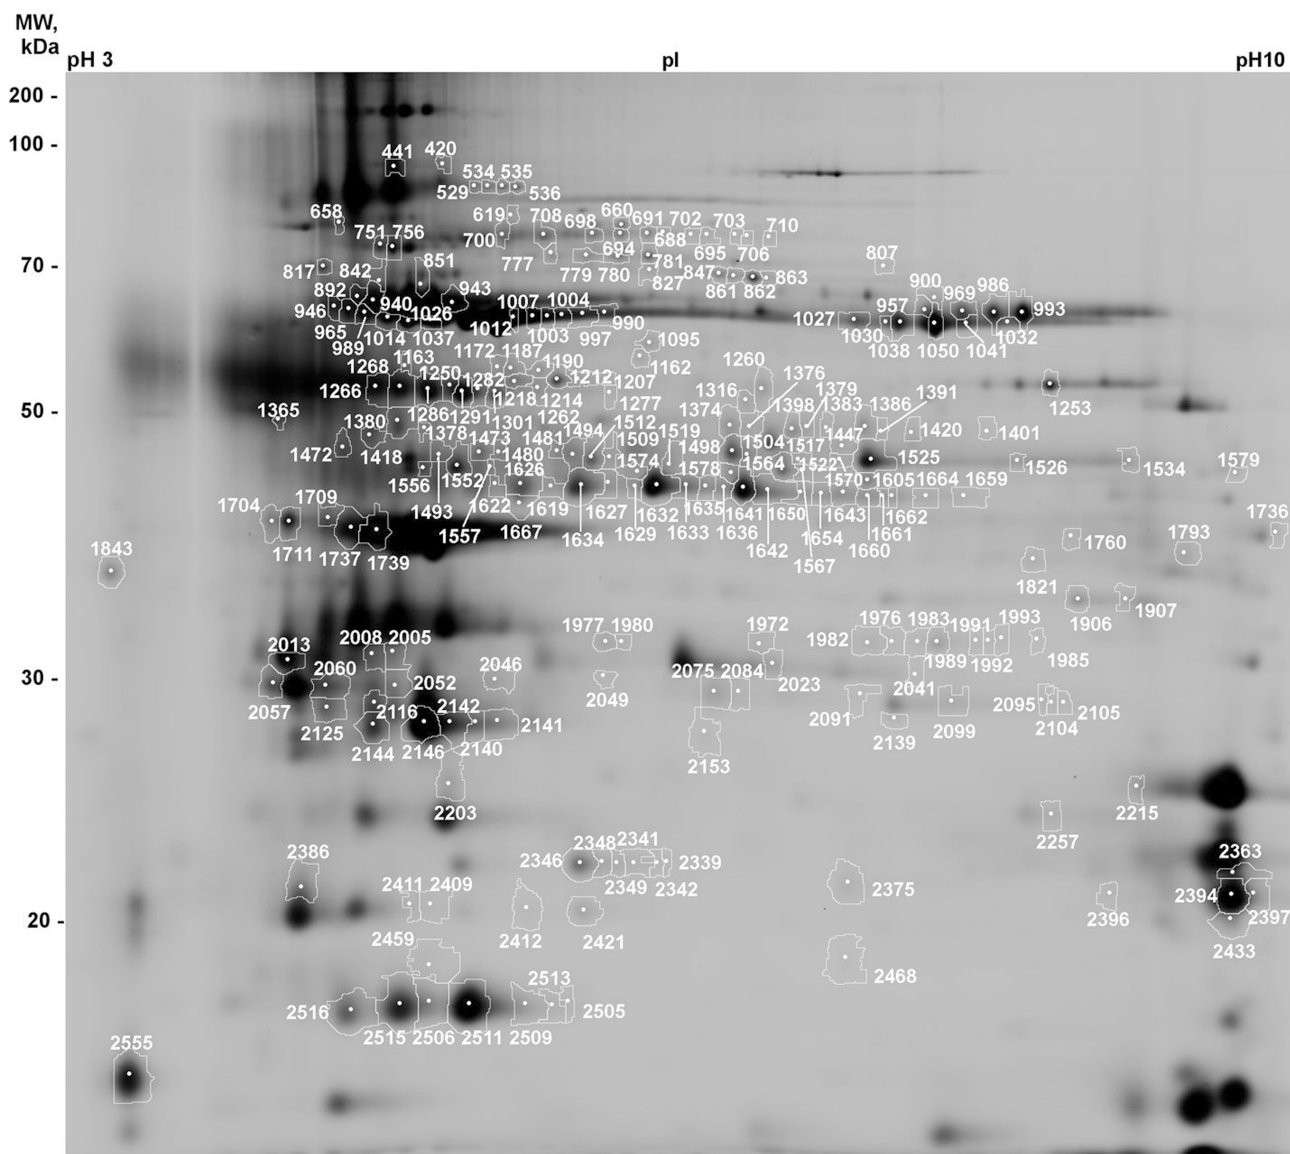

**Fig. S1** Representative 2D-DIGE showing the resolution of about 2600 protein spots from tomato chloroplasts in IEF using pH 3-10 NL 18 cm strips, followed by 12% T SDS-PAGE. Spot visualization was obtained with a Typhoon fluorescence scanner. Differentially represented spots further subjected to nLC-ESI-LIT-MS/MS analysis are highlighted. A Cy-2 labeled pooled sample mixture was used as an internal standard for quantitative measurements.

Table S2. Listed are data referring to spot number, NCBI protein accession number, protein description, MASCOT score value, theoretical and experimental molecular mass and pI values, total and unique peptides detected, sequence coverage (%), EMPAI score value, fold change in drought stressed plants with respect to control, and fold change in recovered drought stressed plants with respect to well-watered control of the same age. In addition, data referring to protein spots not showing significant quantitative variations are reported in italics and highlighted in green. Proteins showing either an incoherent quantitative trend or a constant trend among the experimental conditions are highlighted in blue.

| Spot | NCBI code | Description                                                          | Mascot Score | Mass <sub>th</sub> | Mass <sub>ex</sub> | pI <sub>th</sub> | pI <sub>ex</sub> | Peptides | Unique Peptides | Coverage % | emPAI score | Drought Vs Cntr |         | Drought Rw Vs Cntr Rw |        |
|------|-----------|----------------------------------------------------------------------|--------------|--------------------|--------------------|------------------|------------------|----------|-----------------|------------|-------------|-----------------|---------|-----------------------|--------|
|      |           |                                                                      |              |                    |                    |                  |                  |          |                 |            |             | Ratio           | T-test  | Ratio                 | T-test |
| 420  | 460400133 | <i>Aminopeptidase N-Like</i>                                         | 695          | 102406             | 102406             | 5.55             | 5.90             | 13       | 13              | 18.7       | 0.59        |                 |         |                       |        |
| 441  | 460400133 | <i>Aminopeptidase N-Like</i>                                         | 100          | 102406             | 78939              | 5.55             | 5.68             | 2        | 2               | 3          | 0.07        |                 |         |                       |        |
| 529  | 170435    | <b>Atp-Dependent Protease (Cd4B)</b>                                 | 1435         | 102463             | 76249              | 5.86             | 6.05             | 30       | 28              | 36.4       | 1.51        |                 |         | -1.97                 | 0.003  |
| 534  | 170435    | <b>Atp-Dependent Protease (Cd4B)</b>                                 | 1813         | 102463             | 76249              | 5.86             | 6.11             | 40       | 31              | 34.2       | 2.58        |                 |         | -1.78                 | 0.019  |
| 535  | 170435    | <b>Atp-Dependent Protease (Cd4B)</b>                                 | 1970         | 102463             | 76249              | 5.86             | 6.18             | 66       | 37              | 41         | 3.43        |                 |         | -2.18                 | 0.017  |
| 536  | 170435    | <b>Atp-Dependent Protease (Cd4B)</b>                                 | 1759         | 102463             | 76166              | 5.86             | 6.24             | 70       | 32              | 36.3       | 2.46        |                 |         | -1.99                 | 0.0031 |
| 619  | 27462474  | <i>GcpE</i>                                                          | 662          | 82805              | 72384              | 5.76             | 6.22             | 14       | 14              | 20.4       | 0.77        |                 |         |                       |        |
| 658  | 460369188 | <b>Stromal 70 Kda Heat Shock-Related Protein</b>                     | 1098         | 74965              | 71449              | 5.20             | 5.43             | 28       | 21              | 30.4       | 1.17        |                 |         |                       |        |
|      | 158635118 | <b>Heat Shock Protein 70</b>                                         | 473          | 74415              | 71449              | 5.41             | 5.43             | 13       | 10              | 15.9       | 0.48        | -1.75           | 0.021   |                       |        |
| 660  | 460406209 | <b>Transketolase</b>                                                 | 1525         | 80268              | 71217              | 5.97             | 6.72             | 106      | 31              | 53.8       | 3.24        |                 |         | -2.03                 | 0.034  |
| 698  | 460406209 | <b>Transketolase</b>                                                 | 924          | 80268              | 70068              | 5.97             | 6.59             | 27       | 17              | 25.1       | 1.06        |                 |         | 2.96                  | 0.015  |
| 688  | 37538489  | <b>Ftsh-Like Protein Precursor</b>                                   | 977          | 76138              | 70220              | 5.78             | 6.91             | 15       | 15              | 31.9       | 0.95        |                 |         | 3.37                  | 0.021  |
| 691  | 37538489  | <b>Ftsh-Like Protein Precursor</b>                                   | 869          | 76138              | 70144              | 5.78             | 6.84             | 12       | 12              | 24.2       | 0.77        |                 |         | 2.73                  | 0.037  |
| 694  | 37538489  | <b>Ftsh-Like Protein Precursor</b>                                   | 399          | 76138              | 70068              | 5.78             | 6.72             | 6        | 5               | 10.9       | 0.27        |                 |         | 3.11                  | 0.032  |
| 695  | 37538489  | <b>Ftsh-Like Protein Precursor</b>                                   | 765          | 76138              | 69992              | 5.78             | 7.11             | 12       | 11              | 25.1       | 0.69        |                 |         | 2.86                  | 0.0028 |
| 700  | 37538489  | <b>Ftsh-Like Protein Precursor</b>                                   | 1069         | 76138              | 69992              | 5.78             | 6.18             | 20       | 16              | 32.3       | 1.35        |                 |         | 2.48                  | 0.0043 |
| 702  | 2150027   | <b>Nadp-Malic Enzyme</b>                                             | 417          | 70598              | 70598              | 5.93             | 7.01             | 9        | 8               | 15         | 0.51        |                 |         | 2.16                  | 0.032  |
| 708  | 37538489  | <b>Ftsh-Like Protein Precursor</b>                                   | 740          | 76138              | 69917              | 5.78             | 6.37             | 17       | 13              | 22.7       | 0.95        |                 |         | 2.46                  | 0.0021 |
| 703  | 37538489  | <b>Ftsh-Like Protein Precursor</b>                                   | 686          | 76138              | 69992              | 5.78             | 7.24             | 11       | 11              | 23.2       | 0.69        |                 |         | 3.37                  | 0.0052 |
| 706  | 37538489  | <b>Ftsh-Like Protein Precursor</b>                                   | 392          | 76138              | 69765              | 5.78             | 7.30             | 6        | 6               | 12.6       | 0.33        |                 |         | 3.56                  | 0.014  |
| 710  | 37538489  | <b>Ftsh-Like Protein Precursor</b>                                   | 283          | 76138              | 69690              | 5.78             | 7.39             | 4        | 4               | 8.6        | 0.21        |                 |         | 2.48                  | 0.0022 |
| 751  | 460395390 | <b>Atp-Dependent Zinc Metalloprotease Ftsh 2</b>                     | 2136         | 74424              | 68715              | 6.00             | 5.62             | 50       | 39              | 56.6       | 8.38        |                 |         | -1.92                 | 0.052  |
| 756  | 460395390 | <b>Atp-Dependent Zinc Metalloprotease Ftsh 2</b>                     | 1802         | 74424              | 68492              | 6.00             | 5.68             | 83       | 31              | 42.7       | 3.75        |                 |         | -1.94                 | 0.047  |
| 777  | 460369951 | <i>Ferredoxin-Nitrite Reductase</i>                                  | 475          | 66478              | 67680              | 5.84             | 6.40             | 10       | 9               | 18.1       | 0.63        |                 |         |                       |        |
| 779  | 460369951 | <i>Ferredoxin-Nitrite Reductase</i>                                  | 602          | 66478              | 67387              | 5.84             | 6.56             | 14       | 13              | 21.3       | 0.82        |                 |         |                       |        |
| 780  | 460369951 | <i>Ferredoxin-Nitrite Reductase</i>                                  | 515          | 66478              | 67241              | 5.84             | 6.71             | 12       | 10              | 19.8       | 0.54        |                 |         |                       |        |
| 781  | 460401031 | <b>Polyphenol Oxidase F</b>                                          | 604          | 66950              | 67387              | 6.04             | 6.85             | 15       | 13              | 21.5       | 1.13        | -2.75           | 0.055   |                       |        |
| 817  | 460411525 | <b>Rubisco Large Subunit-Binding Protein Subunit Alpha</b>           | 1974         | 62032              | 65728              | 5.21             | 5.21             | 50       | 33              | 61.4       | 8.13        |                 |         | -1.74                 | 0.022  |
| 842  | 460379814 | <b>Rubisco Large Subunit-Binding Protein Subunit Beta</b>            | 1348         | 64527              | 64459              | 5.46             | 5.62             | 23       | 21              | 44         | 2.24        | -1.77           | 0.0045  |                       |        |
|      | 460411525 | <b>Rubisco Large Subunit-Binding Protein Subunit Alpha</b>           | 644          | 62032              | 64459              | 5.21             | 5.62             | 11       | 10              | 23.5       | 0.9         |                 |         |                       |        |
| 851  | 460366131 | <b>Rubisco Large Subunit-Binding Protein Subunit Beta</b>            | 1890         | 63238              | 64041              | 5.72             | 5.81             | 58       | 33              | 64.4       | 5.58        | -1.52           | 0.063   | -1.7                  | 0.021  |
| 827  | 260528216 | <i>Inosine Monophosphate Cyclohydrolase</i>                          | 654          | 66199              | 65728              | 6.21             | 6.85             | 18       | 15              | 28.2       | 1.15        |                 |         |                       |        |
| 847  | 22733     | <b>Polyphenol Oxidase Precursor</b>                                  | 353          | 66822              | 65232              | 6.36             | 7.17             | 8        | 7               | 11.9       | 0.46        | -1.66           | 0.024   |                       |        |
| 861  | 22733     | <b>Polyphenol Oxidase Precursor</b>                                  | 427          | 66822              | 65020              | 6.36             | 7.23             | 11       | 9               | 18.4       | 0.54        | -1.62           | 0.016   |                       |        |
|      | 460395681 | <b>Ketol-Acid Reductoisomerase</b>                                   | 386          | 64192              | 65020              | 6.31             | 7.23             | 8        | 7               | 15         | 0.57        |                 |         |                       |        |
| 862  | 460401033 | <b>Polyphenol Oxidase E</b>                                          | 801          | 66808              | 64809              | 6.36             | 7.32             | 28       | 16              | 32.7       | 1.38        | -1.9            | 0.057   |                       |        |
| 863  | 460395681 | <b>Ketol-Acid Reductoisomerase</b>                                   | 282          | 64192              | 64739              | 6.31             | 7.39             | 6        | 6               | 14.3       | 0.4         | -1.86           | 0.029   |                       |        |
| 892  | 84371968  | <b>Atp Synthase Cfl Alpha Subunit</b>                                | 938          | 55434              | 62668              | 5.14             | 5.52             | 77       | 18              | 35.7       | 2.23        | -1.85           | 0.014   |                       |        |
| 940  | 84371968  | <b>Atp Synthase Cfl Alpha Subunit</b>                                | 1073         | 55434              | 62194              | 5.14             | 5.59             | 73       | 21              | 40.6       | 3.47        | -1.7            | 0.015   |                       |        |
| 943  | 84371968  | <b>Atp Synthase Cfl Alpha Subunit</b>                                | 970          | 55434              | 61992              | 5.14             | 5.95             | 103      | 18              | 36.9       | 3.77        | -1.91           | 0.054   |                       |        |
| 946  | 84371990  | <b>Atp Synthase Cfl Beta Subunit</b>                                 | 1320         | 53491              | 61524              | 5.28             | 5.41             | 58       | 25              | 63.1       | 6.06        | -2.06           | 0.016   |                       |        |
| 965  | 84371990  | <b>Atp Synthase Cfl Beta Subunit</b>                                 | 1173         | 53421              | 61258              | 5.14             | 5.48             | 46       | 21              | 57         | 5.19        | -2.28           | 0.00043 |                       |        |
| 989  | 84371990  | <b>Atp Synthase Cfl Beta Subunit</b>                                 | 1174         | 53421              | 60861              | 5.14             | 5.55             | 54       | 20              | 58.6       | 4.41        | -1.89           | 0.014   |                       |        |
| 1014 | 84371990  | <b>Atp Synthase Cfl Beta Subunit</b>                                 | 1476         | 53491              | 60335              | 5.28             | 5.66             | 108      | 24              | 58.6       | 7.64        | -1.95           | 0.0086  |                       |        |
|      | 460386362 | <b>Atp Synthase Subunit Beta</b>                                     | 1066         | 59684              | 60335              | 5.74             | 5.66             | 40       | 19              | 47.8       | 2.35        |                 |         |                       |        |
| 1026 | 84371990  | <b>Atp Synthase Cfl Beta Subunit</b>                                 | 1660         | 53491              | 60074              | 5.28             | 5.85             | 186      | 29              | 67.5       | 13.8        | -1.74           | 0.032   |                       |        |
| 1037 | 84371990  | <b>Atp Synthase Cfl Beta Subunit</b>                                 | 1220         | 53491              | 59944              | 5.28             | 5.75             | 72       | 22              | 59.2       | 5.17        | -1.71           | 0.011   |                       |        |
| 990  | 84371990  | <b>Atp Synthase Cfl Beta Subunit</b>                                 | 1859         | 53491              | 60927              | 5.28             | 6.65             | 154      | 31              | 80.7       | 19.73       |                 |         | -1.75                 | 0.018  |
| 997  | 84371990  | <b>Atp Synthase Cfl Beta Subunit</b>                                 | 1612         | 53491              | 60729              | 5.28             | 6.54             | 91       | 26              | 66.1       | 12.84       |                 |         | -1.77                 | 0.0063 |
| 1003 | 84371990  | <b>Atp Synthase Cfl Beta Subunit</b>                                 | 1510         | 53491              | 60532              | 5.28             | 6.38             | 158      | 25              | 72.1       | 11.94       |                 |         | -1.82                 | 0.016  |
| 1004 | 84371990  | <b>Atp Synthase Cfl Beta Subunit</b>                                 | 1798         | 53491              | 60597              | 5.28             | 6.45             | 217      | 29              | 70.3       | 26.15       |                 |         | -1.81                 | 0.011  |
| 1007 | 84371990  | <b>Atp Synthase Cfl Beta Subunit</b>                                 | 1525         | 53491              | 60532              | 5.28             | 6.32             | 161      | 23              | 66.1       | 17.12       |                 |         | -2.32                 | 0.024  |
| 1012 | 84371990  | <b>Atp Synthase Cfl Beta Subunit</b>                                 | 2070         | 53491              | 60335              | 5.28             | 6.23             | 219      | 33              | 83.1       | 39.67       |                 |         | -2.67                 | 0.058  |
| 1207 | 84371990  | <b>Atp Synthase Cfl Beta Subunit</b>                                 | 1104         | 53491              | 54021              | 5.28             | 6.65             | 48       | 21              | 67.9       | 4.04        |                 |         | -2.65                 | 0.024  |
| 807  | 84371991  | <b>Ribulose-1.5-Bisphosphate Carboxylase/Oxygenase Large Subunit</b> | 163          | 53434              | 66086              | 6.55             | 7.92             | 5        | 4               | 8.8        | 0.31        |                 |         | 1.58                  | 0.047  |
| 900  | 84371991  | <i>Ribulose-1.5-Bisphosphate Carboxylase/Oxygenase Large Subunit</i> | 1009         | 53434              | 62464              | 6.55             | 8.15             | 57       | 19              | 37.5       | 3.72        |                 |         |                       |        |
| 993  | 84371991  | <b>Ribulose-1.5-Bisphosphate Carboxylase/Oxygenase Large Subunit</b> | 1059         | 53434              | 60927              | 6.55             | 8.55             | 52       | 20              | 38.6       | 5.62        |                 |         | -1.66                 | 0.038  |
| 969  | 84371991  | <i>Ribulose-1.5-Bisphosphate Carboxylase/Oxygenase Large Subunit</i> | 790          | 53434              | 60993              | 6.55             | 8.28             | 25       | 14              | 29.6       | 2.37        |                 |         |                       |        |
| 986  | 349144    | <i>Ribulose-1.5-Bisphosphate Carboxylase/Oxygenase Large Subunit</i> | 947          | 53398              | 60927              | 6.55             | 8.43             | 51       | 18              | 35         | 3.13        |                 |         |                       |        |
| 957  | 349144    | <i>Ribulose-1.5-Bisphosphate Carboxylase/Oxygenase Large Subunit</i> | 1334         | 53398              | 61191              | 6.55             | 8.11             | 95       | 27              | 49.1       | 12.01       |                 |         |                       |        |

| Spot | NCBI code | Description                                                   | Mascot Score | Mass <sub>th</sub> | Mass <sub>ex</sub> | pI <sub>th</sub> | pI <sub>ex</sub> | Peptides | Unique Peptides | Coverage % | emPAI score | Drought Vs Cntr |        | Drought Rw Vs Cntr Rw |          |
|------|-----------|---------------------------------------------------------------|--------------|--------------------|--------------------|------------------|------------------|----------|-----------------|------------|-------------|-----------------|--------|-----------------------|----------|
|      |           |                                                               |              |                    |                    |                  |                  |          |                 |            |             | Ratio           | T-test | Ratio                 | T-test   |
| 1027 | 84371991  | Ribulose-1.5-Bisphosphate Carboxylase/Oxygenase Large Subunit | 896          | 53434              | 60074              | 6.55             | 7.79             | 42       | 17              | 31.7       | 2.86        |                 |        | -2.56                 | 0.039    |
| 1030 | 84371991  | Ribulose-1.5-Bisphosphate Carboxylase/Oxygenase Large Subunit | 1110         | 53434              | 59815              | 6.55             | 7.93             | 43       | 21              | 37.5       | 5.62        |                 |        | -2.25                 | 0.0074   |
| 1032 | 349144    | Ribulose-1.5-Bisphosphate Carboxylase/Oxygenase Large Subunit | 1414         | 53398              | 59815              | 6.55             | 8.48             | 94       | 28              | 50.9       | 12.91       |                 |        | -1.88                 | 0.016    |
| 1038 | 349144    | Ribulose-1.5-Bisphosphate Carboxylase/Oxygenase Large Subunit | 1405         | 53398              | 59879              | 6.55             | 8.00             | 100      | 29              | 53.5       | 9.62        |                 |        | -3.79                 | 0.022    |
| 1041 | 84371991  | Ribulose-1.5-Bisphosphate Carboxylase/Oxygenase Large Subunit | 1386         | 53434              | 59750              | 6.55             | 8.30             | 75       | 28              | 48.4       | 7.67        |                 |        | -2.13                 | 0.0066   |
| 1050 | 349144    | Ribulose-1.5-Bisphosphate Carboxylase/Oxygenase Large Subunit | 1938         | 53398              | 59685              | 6.55             | 8.15             | 178      | 36              | 65.8       | 28.24       |                 |        | -3.69                 | 0.0075   |
| 1095 | 460376468 | Atp Sulfurylase 1                                             | 378          | 52376              | 57713              | 6.94             | 6.85             | 13       | 10              | 23.6       | 0.86        |                 |        | -3.06                 | 0.0091   |
| 1162 | 642911    | Glutamate 1-Semialdehyde 2.1-Aminomutase                      | 702          | 51722              | 56292              | 6.54             | 6.81             | 16       | 13              | 30.6       | 1.65        |                 |        | 1.51                  | 0.037    |
| 1163 | 262176919 | Isph Protein                                                  | 459          | 52147              | 55385              | 5.38             | 5.74             | 11       | 11              | 23.2       | 1           |                 |        | -1.62                 | 0.02     |
| 1172 | 460391817 | Elongation Factor Tua                                         | 771          | 56286              | 55205              | 6.69             | 6.16             | 28       | 14              | 35.5       | 1.97        |                 |        | -6.22                 | 0.023    |
| 1187 | 460391817 | Elongation Factor Tua                                         | 815          | 56286              | 55145              | 6.69             | 6.22             | 21       | 15              | 30.3       | 2.84        |                 |        | -2.89                 | 0.013    |
| 1190 | 460391817 | Elongation Factor Tua                                         | 1246         | 56286              | 54907              | 6.69             | 6.34             | 64       | 22              | 48.6       | 7.84        |                 |        | -3.18                 | 0.026    |
| 1212 | 460396820 | Phosphoglycerate Kinase                                       | 1325         | 50592              | 54080              | 7.66             | 6.53             | 61       | 23              | 61.8       | 5.36        |                 |        | -2.56                 | 0.021    |
| 1214 | 460396820 | Phosphoglycerate Kinase                                       | 1499         | 50592              | 54021              | 7.66             | 6.43             | 85       | 27              | 68.7       | 8.75        |                 |        | -3.48                 | 0.02     |
| 1218 | 460396820 | Phosphoglycerate Kinase                                       | 1071         | 50592              | 53846              | 7.66             | 6.24             | 41       | 19              | 50.8       | 3.78        |                 |        | -2.59                 | 0.0059   |
| 1250 | 460367196 | Glutamine Synthetase                                          | 741          | 47852              | 53439              | 6.29             | 5.94             | 58       | 15              | 34.7       | 2.59        |                 |        | -5.09                 | 0.0045   |
| 1260 | 460415552 | Glyceraldehyde-3-Phosphate Dehydrogenase B                    | 828          | 48539              | 53150              | 6.72             | 7.34             | 47       | 15              | 33.3       | 2.8         |                 |        | -2.47                 | 0.037    |
| 1316 | 460385509 | Glyceraldehyde-3-Phosphate Dehydrogenase B                    | 878          | 51421              | 52067              | 6.86             | 7.29             | 59       | 17              | 36.3       | 3.06        |                 |        | -2.42                 | 0.039    |
| 1401 | 460382243 | Glyceraldehyde-3-Phosphate Dehydrogenase A                    | 397          | 42940              | 49214              | 8.46             | 8.39             | 11       | 7               | 17         | 1.12        |                 |        | -3.35                 | 0.0015   |
| 1420 | 460382243 | Glyceraldehyde-3-Phosphate Dehydrogenase A                    | 1033         | 42940              | 49107              | 8.46             | 8.05             | 54       | 16              | 44.1       | 7.09        |                 |        | -3.49                 | 0.033    |
| 1253 | 460398807 | Aspartate Aminotransferase                                    | 270          | 50984              | 50984              | 9.06             | 9.12             | 5        | 5               | 10.8       | 0.33        |                 |        | 1.49                  | 0.0063   |
| 1266 | 460401823 | Ribulose Bisphosphate Carboxylase/Oxygenase Activase 1        | 681          | 49054              | 53381              | 8.15             | 5.60             | 16       | 14              | 36.3       | 1.24        |                 |        | -3.37                 | 0.0044   |
| 1268 | 460401823 | Ribulose Bisphosphate Carboxylase/Oxygenase Activase 1        | 843          | 49054              | 53323              | 8.15             | 5.71             | 23       | 17              | 35.1       | 2.23        |                 |        | -3.89                 | 0.0068   |
| 1262 | 460401823 | Ribulose Bisphosphate Carboxylase/Oxygenase Activase 1        | 1150         | 49054              | 53266              | 8.15             | 6.34             | 37       | 24              | 51         | 3.03        |                 |        | -2.81                 | 0.0082   |
| 1277 | 460401823 | Ribulose Bisphosphate Carboxylase/Oxygenase Activase 1        | 921          | 49054              | 52806              | 8.15             | 6.67             | 16       | 16              | 38.1       | 2.01        |                 |        | -2.39                 | 0.041    |
| 1282 | 460401823 | Ribulose Bisphosphate Carboxylase/Oxygenase Activase 1        | 988          | 49054              | 53150              | 8.15             | 6.07             | 84       | 15              | 35.4       | 4.82        |                 |        | -4.07                 | 0.036    |
| 1286 | 460401823 | Ribulose Bisphosphate Carboxylase/Oxygenase Activase 1        | 1297         | 49054              | 53150              | 8.15             | 5.84             | 98       | 25              | 42.9       | 8.03        |                 |        | -4.7                  | 0.0016   |
| 1291 | 460401823 | Ribulose Bisphosphate Carboxylase/Oxygenase Activase 1        | 1161         | 49054              | 52863              | 8.15             | 6.00             | 91       | 21              | 37.6       | 9.46        |                 |        | -4.17                 | 0.0094   |
| 1301 | 460401823 | Ribulose Bisphosphate Carboxylase/Oxygenase Activase 1        | 1398         | 49054              | 52920              | 8.15             | 6.15             | 60       | 25              | 48.1       | 5.74        |                 |        | -3.5                  | 0.0031   |
| 1374 | 26453355  | Mrna Binding Protein Precursor                                | 485          | 44084              | 49804              | 7.1              | 7.22             | 11       | 9               | 30.2       | 1.26        |                 |        | -2.17                 | 0.012    |
| 1376 | 26453355  | Mrna Binding Protein Precursor                                | 575          | 44084              | 49643              | 7.1              | 7.31             | 11       | 10              | 32.9       | 1.26        |                 |        | -1.79                 | 0.0089   |
| 1398 | 26453355  | Mrna Binding Protein Precursor                                | 619          | 44084              | 49428              | 7.1              | 7.50             | 20       | 13              | 34.4       | 1.66        |                 |        | -2.94                 | 0.0021   |
| 1365 | 38604456  | Fructokinase 3                                                | 895          | 41803              | 50292              | 5.57             | 5.16             | 16       | 16              | 51.8       | 2.05        |                 |        |                       |          |
|      | 460398434 | Cysteine Synthase                                             | 491          | 41255              | 50292              | 5.41             | 5.16             | 9        | 8               | 26.4       | 1.19        | 1.57            | 0.058  |                       |          |
| 1380 | 460400830 | Phosphoribulokinase                                           | 996          | 44793              | 50183              | 5.96             | 5.70             | 66       | 18              | 62.3       | 3.97        |                 |        | -2.12                 | 0.019    |
| 1378 | 460400830 | Phosphoribulokinase                                           | 643          | 44793              | 49589              | 5.96             | 5.82             | 18       | 13              | 31.8       | 1.83        |                 |        |                       |          |
|      | 238563983 | Chloroplast Sedoheptulose-1.7-Bisphosphatase                  | 463          | 43017              | 49589              | 6.07             | 5.82             | 10       | 9               | 24.6       | 1.3         |                 |        |                       |          |
| 1418 | 460400830 | Phosphoribulokinase                                           | 603          | 44793              | 48948              | 5.96             | 5.57             | 16       | 13              | 33.3       | 1.62        |                 |        | -2.19                 | 0.00067  |
|      | 238563983 | Chloroplast Sedoheptulose-1.7-Bisphosphatase                  | 519          | 43017              | 48948              | 6.07             | 5.57             | 36       | 11              | 28.4       | 2.8         |                 |        |                       |          |
| 1472 | 238563983 | Chloroplast Sedoheptulose-1.7-Bisphosphatase                  | 954          | 43017              | 47899              | 6.07             | 5.45             | 95       | 20              | 44.2       | 6.4         |                 |        | -2.1                  | 0.015    |
| 1379 | 460391607 | Chloroplast Stem-Loop Binding Protein Of 41 Kda B             | 674          | 42596              | 49643              | 7.67             | 7.57             | 15       | 13              | 32.7       | 1.75        |                 |        | -3.27                 | 0.0018   |
| 1383 | 460391607 | Chloroplast Stem-Loop Binding Protein Of 41 Kda B             | 541          | 42596              | 49535              | 7.67             | 7.66             | 15       | 11              | 31.9       | 1.75        |                 |        | -2.00                 | 0.014    |
| 1386 | 460391607 | Chloroplast Stem-Loop Binding Protein Of 41 Kda B             | 1210         | 42596              | 49643              | 7.67             | 7.83             | 43       | 24              | 60.4       | 9.58        |                 |        | -5.83                 | 0.024    |
| 1391 | 460391607 | Chloroplast Stem-Loop Binding Protein Of 41 Kda B             | 316          | 42596              | 49214              | 7.67             | 7.91             | 7        | 7               | 22.2       | 0.66        |                 |        | -2.64                 | 0.015    |
| 1447 | 460391607 | Chloroplast Stem-Loop Binding Protein Of 41 Kda B             | 432          | 42596              | 47950              | 7.67             | 7.73             | 9        | 9               | 23.2       | 0.96        | -1.97           | 0.011  |                       |          |
| 1667 | 460365514 | Uncharacterized Protein Loc101254513                          | 735          | 37384              | 43306              | 7.52             | 6.26             | 26       | 14              | 36.7       | 4.09        |                 |        |                       |          |
| 1473 | 460371306 | Photosystem Ii Stability/Assembly Factor Hcf136               | 787          | 44248              | 47485              | 6.25             | 6.07             | 20       | 12              | 41.4       | 1.44        |                 |        | -2.29                 | 0.016    |
| 1480 | 460371306 | Photosystem Ii Stability/Assembly Factor Hcf136               | 794          | 44248              | 47434              | 6.25             | 6.16             | 20       | 11              | 36.2       | 2.11        |                 |        | -2.51                 | 0.014    |
| 1481 | 460371306 | Photosystem Ii Stability/Assembly Factor Hcf136               | 315          | 44248              | 47588              | 6.25             | 6.43             | 4        | 4               | 17.5       | 0.38        |                 |        | -1.88                 | 0.0065   |
| 1493 | 460371306 | Photosystem Ii Stability/Assembly Factor Hcf136               | 825          | 44248              | 47280              | 6.25             | 5.89             | 16       | 11              | 40.1       | 1.44        |                 |        | -1.88                 | 0.000031 |
| 1494 | 460371306 | Photosystem Ii Stability/Assembly Factor Hcf136               | 499          | 44248              | 47280              | 6.25             | 6.50             | 8        | 6               | 24.1       | 0.76        |                 |        | -2.45                 | 0.0019   |
|      | 460370090 | Fructose-Bisphosphate Aldolase 2                              | 445          | 43032              | 47280              | 6.85             | 6.50             | 12       | 9               | 22.9       | 0.79        |                 |        |                       |          |
| 1517 | 460373820 | Atp Synthase Gamma Chain                                      | 554          | 41752              | 46872              | 8.15             | 7.53             | 12       | 9               | 26.8       | 1.36        |                 |        | -2.17                 | 0.048    |
|      | 460373309 | Fructose-Bisphosphate Aldolase 2                              | 488          | 42656              | 46872              | 8.15             | 7.53             | 11       | 9               | 28.1       | 1.13        |                 |        |                       |          |
| 1498 | 460373820 | Atp Synthase Gamma Chain                                      | 828          | 41752              | 47537              | 8.15             | 7.23             | 46       | 13              | 42.4       | 5.63        |                 |        | -2.27                 | 0.015    |
| 1504 | 460373820 | Atp Synthase Gamma Chain                                      | 562          | 41752              | 47228              | 8.15             | 7.29             | 15       | 9               | 27.9       | 2.06        |                 |        | -2.12                 | 0.031    |
| 1522 | 460373820 | Atp Synthase Gamma Chain                                      | 828          | 41752              | 46821              | 8.15             | 7.72             | 31       | 15              | 39         | 2.33        | -2.36           | 0.067  |                       |          |
| 1525 | 460373820 | Atp Synthase Gamma Chain                                      | 1051         | 41752              | 46872              | 8.15             | 7.86             | 69       | 18              | 44.6       | 10.11       |                 |        | -2.48                 | 0.0065   |
| 1526 | 460373820 | Atp Synthase Gamma Chain                                      | 729          | 41752              | 46719              | 8.15             | 8.53             | 21       | 15              | 35.3       | 2.96        |                 |        | -2.34                 | 0.02     |
| 1534 | 460373820 | Atp Synthase Gamma Chain                                      | 785          | 41752              | 46719              | 8.15             | 9.28             | 38       | 14              | 39         | 4.58        | -2.18           | 0.038  |                       |          |
| 1605 | 460373820 | Atp Synthase Gamma Chain                                      | 580          | 41752              | 45176              | 8.15             | 7.85             | 14       | 9               | 28.6       | 1.58        |                 |        | -2.00                 | 0.00038  |
| 1556 | 460375513 | Fructose-Bisphosphate Aldolase 2                              | 665          | 42872              | 46166              | 6.07             | 5.82             | 15       | 12              | 38.7       | 2.23        |                 |        | -2.14                 | 0.034    |
| 1509 | 460370090 | Fructose-Bisphosphate Aldolase 2                              | 763          | 43032              | 47075              | 6.85             | 6.67             | 45       | 15              | 42.1       | 3.13        |                 |        | -4.45                 | 0.015    |
| 1512 | 460370090 | Fructose-Bisphosphate Aldolase 2                              | 846          | 43032              | 47075              | 6.85             | 6.59             | 63       | 15              | 40.1       | 3.49        |                 |        | -4.8                  | 0.003    |
| 1552 | 460375513 | Fructose-Bisphosphate Aldolase 2                              | 689          | 42872              | 46366              | 6.07             | 5.97             | 33       | 13              | 41         | 4.35        |                 |        | -4.44                 | 0.0051   |
| 1557 | 460375513 | Fructose-Bisphosphate Aldolase 2                              | 433          | 42872              | 46216              | 6.07             | 6.12             | 12       | 7               | 20.3       | 1.13        |                 |        | -2.69                 | 0.057    |
| 1564 | 460373309 | Fructose-Bisphosphate Aldolase 2                              | 835          | 42656              | 46316              | 8.15             | 7.46             | 48       | 13              | 41.1       | 5.38        |                 |        | -3.79                 | 0.0061   |

| Spot | NCBI code | Description                                                       | Mascot Score | Mass <sub>th</sub> | Mass <sub>ex</sub> | pI <sub>th</sub> | pI <sub>ex</sub> | Peptides | Unique Peptides | Coverage % | emPAI score | Drought Vs Cntr |        | Drought Rw Vs Cntr Rw |         |
|------|-----------|-------------------------------------------------------------------|--------------|--------------------|--------------------|------------------|------------------|----------|-----------------|------------|-------------|-----------------|--------|-----------------------|---------|
|      |           |                                                                   |              |                    |                    |                  |                  |          |                 |            |             | Ratio           | T-test | Ratio                 | T-test  |
| 1567 | 460373309 | Fructose-Bisphosphate Aldolase 2                                  | 663          | 42656              | 45916              | 8.15             | 7.54             | 20       | 12              | 31.6       | 2.85        |                 |        | -3.23                 | 0.036   |
| 1570 | 460404664 | Malate Dehydrogenase                                              | 294          | 45023              | 45023              | 8.14             | 7.72             | 6        | 6               | 16.8       | 0.61        | 2.08            | 0.011  |                       |         |
| 1574 | 460373374 | Ferredoxin--Nadp Reductase. Leaf-Type Isozyme                     | 525          | 40774              | 45817              | 8.37             | 6.79             | 10       | 9               | 29.6       | 0.85        |                 |        | -2.34                 | 0.012   |
|      | 460373820 | Atp Synthase Gamma Chain                                          | 309          | 41752              | 45817              | 8.15             | 6.79             | 6        | 6               | 19.4       | 0.54        |                 |        |                       |         |
| 1578 | 460373820 | Atp Synthase Gamma Chain                                          | 486          | 41752              | 45718              | 8.15             | 7.23             | 13       | 10              | 26.3       | 1.17        |                 |        | -2.97                 | 0.0052  |
|      | 460373374 | Ferredoxin--Nadp Reductase. Leaf-Type Isozyme                     | 475          | 40774              | 45718              | 8.37             | 7.23             | 12       | 8               | 25.4       | 0.85        |                 |        |                       |         |
| 1579 | 460395539 | Protochlorophyllide Reductase                                     | 450          | 43514              | 45767              | 9.27             | 9.53             | 8        | 7               | 19.5       | 0.64        |                 |        |                       |         |
| 1622 | 460365477 | Malonyl-Coa-Acyl Carrier Protein Transacylase. Mitochondrial-Like | 877          | 38298              | 44835              | 6.24             | 6.14             | 17       | 16              | 47.9       | 3.07        |                 |        | -1.82                 | 0.0047  |
| 1626 | 460373374 | Ferredoxin--Nadp Reductase. Leaf-Type Isozyme                     | 398          | 40774              | 44835              | 8.37             | 6.26             | 9        | 8               | 26.8       | 0.7         |                 |        | -2.63                 | 0.017   |
| 1519 | 460373374 | Ferredoxin--Nadp Reductase. Leaf-Type Isozyme                     | 535          | 40774              | 46467              | 8.37             | 6.94             | 12       | 9               | 32.9       | 1.63        |                 |        | -5.27                 | 0.026   |
| 1619 | 460373374 | Ferredoxin--Nadp Reductase. Leaf-Type Isozyme                     | 532          | 40774              | 44689              | 8.37             | 6.40             | 10       | 9               | 28.2       | 1.02        |                 |        | -2.05                 | 0.0033  |
| 1627 | 460373374 | Ferredoxin--Nadp Reductase. Leaf-Type Isozyme                     | 540          | 40774              | 44981              | 8.37             | 6.66             | 12       | 10              | 31.5       | 1.41        |                 |        | -3.3                  | 0.0057  |
| 1629 | 460373374 | Ferredoxin--Nadp Reductase. Leaf-Type Isozyme                     | 540          | 40774              | 44689              | 8.37             | 6.78             | 15       | 11              | 38.4       | 1.88        |                 |        | -3.16                 | 0.0081  |
| 1632 | 460373374 | Ferredoxin--Nadp Reductase. Leaf-Type Isozyme                     | 687          | 40774              | 44786              | 8.37             | 6.88             | 30       | 12              | 47         | 3.47        |                 |        | -4.22                 | 0.00096 |
| 1633 | 460373374 | Ferredoxin--Nadp Reductase. Leaf-Type Isozyme                     | 740          | 40774              | 44786              | 8.37             | 7.02             | 24       | 15              | 42.5       | 3.09        |                 |        | -5.3                  | 0.016   |
| 1634 | 460373374 | Ferredoxin--Nadp Reductase. Leaf-Type Isozyme                     | 638          | 40774              | 44786              | 8.37             | 6.54             | 32       | 12              | 37.6       | 2.43        |                 |        | -2.96                 | 0.00053 |
| 1635 | 460373374 | Ferredoxin--Nadp Reductase. Leaf-Type Isozyme                     | 672          | 40774              | 44689              | 8.37             | 7.11             | 21       | 14              | 44.2       | 3.09        |                 |        | -3.89                 | 0.0024  |
| 1636 | 460373374 | Ferredoxin--Nadp Reductase. Leaf-Type Isozyme                     | 617          | 40774              | 44544              | 8.37             | 7.19             | 21       | 11              | 30.9       | 1.63        |                 |        | -4.92                 | 0.015   |
| 1641 | 460373374 | Ferredoxin--Nadp Reductase. Leaf-Type Isozyme                     | 1212         | 40774              | 44544              | 8.37             | 7.28             | 68       | 22              | 63.3       | 15.75       |                 |        | -7.01                 | 0.0047  |
| 1642 | 460373374 | Ferredoxin--Nadp Reductase. Leaf-Type Isozyme                     | 842          | 40774              | 44399              | 8.37             | 7.39             | 54       | 15              | 48.9       | 5.36        |                 |        | -7.9                  | 0.015   |
| 1643 | 460373374 | Ferredoxin--Nadp Reductase. Leaf-Type Isozyme                     | 771          | 40774              | 44159              | 8.37             | 7.73             | 35       | 15              | 48.3       | 2.43        |                 |        | -3.65                 | 0.054   |
| 1650 | 460373374 | Ferredoxin--Nadp Reductase. Leaf-Type Isozyme                     | 708          | 40774              | 44159              | 8.37             | 7.54             | 23       | 14              | 47.2       | 2.43        |                 |        | -6.44                 | 0.012   |
| 1659 | 460373374 | Ferredoxin--Nadp Reductase. Leaf-Type Isozyme                     | 551          | 40774              | 43873              | 8.37             | 8.29             | 14       | 10              | 32         | 1.41        |                 |        | -5.15                 | 0.021   |
| 1660 | 460373374 | Ferredoxin--Nadp Reductase. Leaf-Type Isozyme                     | 764          | 40774              | 43921              | 8.37             | 7.85             | 17       | 15              | 53.3       | 3.09        |                 |        | -6.23                 | 0.0068  |
| 1661 | 460373374 | Ferredoxin--Nadp Reductase. Leaf-Type Isozyme                     | 605          | 40774              | 43921              | 8.37             | 7.91             | 19       | 11              | 37.6       | 2.14        |                 |        | -7.49                 | 0.027   |
| 1662 | 460373374 | Ferredoxin--Nadp Reductase. Leaf-Type Isozyme                     | 648          | 40774              | 43921              | 8.37             | 7.96             | 28       | 12              | 37.3       | 2.14        |                 |        | -8.33                 | 0.044   |
| 1664 | 460373374 | Ferredoxin--Nadp Reductase. Leaf-Type Isozyme                     | 639          | 40774              | 43873              | 8.37             | 8.11             | 20       | 12              | 47.2       | 1.41        |                 |        | -6.7                  | 0.016   |
| 1654 | 460373374 | Ferredoxin--Nadp Reductase. Leaf-Type Isozyme                     | 644          | 40774              | 44064              | 8.37             | 7.63             | 20       | 14              | 42.5       | 2.14        |                 |        | -7.4                  | 0.0081  |
| 1704 | 83743301  | Plastid Lipid Associated Protein Chrc                             | 293          | 35685              | 41966              | 5.26             | 5.13             | 5        | 5               | 21.2       | 0.49        | 1.69            | 0.026  |                       |         |
| 1711 | 83743301  | Plastid Lipid Associated Protein Chrc                             | 424          | 35685              | 41966              | 5.26             | 5.21             | 13       | 9               | 30.1       | 1.47        | 1.81            | 0.02   |                       |         |
| 1709 | 460372520 | Oxygen-Evolving Enhancer Protein 1                                | 1014         | 35478              | 42194              | 5.84             | 5.38             | 30       | 18              | 59.2       | 5.78        | -2.02           | 0.04   |                       |         |
|      | 19157     | 33Kda Precursor Protein Of Oxygen-Evolving Complex                | 886          | 35154              | 42194              | 5.91             | 5.38             | 21       | 16              | 45.9       | 4.08        |                 |        |                       |         |
| 1737 | 460372520 | Oxygen-Evolving Enhancer Protein 1                                | 1000         | 35478              | 41514              | 5.84             | 5.49             | 24       | 16              | 57.7       | 4.54        |                 |        |                       |         |
|      | 19157     | 33Kda Precursor Protein Of Oxygen-Evolving Complex                | 780          | 35154              | 41514              | 5.91             | 5.49             | 18       | 13              | 41         | 2.75        |                 |        |                       |         |
| 1739 | 19157     | 33Kda Precursor Protein Of Oxygen-Evolving Complex                | 1368         | 35154              | 41290              | 5.91             | 5.61             | 70       | 24              | 66.9       | 18.06       | 1.58            | 0.019  |                       |         |
|      | 460372520 | Oxygen-Evolving Enhancer Protein 1                                | 1335         | 35478              | 41290              | 5.84             | 5.61             | 64       | 24              | 64.3       | 17.55       |                 |        |                       |         |
| 2013 | 19157     | 33Kda Precursor Protein Of Oxygen-Evolving Complex                | 188          | 35154              | 32743              | 5.91             | 5.20             | 3        | 3               | 18.8       | 0.36        |                 |        |                       |         |
|      | 460372520 | Oxygen-Evolving Enhancer Protein 1                                | 219          | 35478              | 32743              | 5.84             | 5.20             | 4        | 4               | 21.6       | 0.35        |                 |        |                       |         |
| 1821 | 460385181 | Gamma Carbonic Anhydrase 2. Mitochondrial-Like                    | 233          | 29604              | 39239              | 6.8              | 8.60             | 6        | 6               | 29.3       | 1.06        | -1.46           | 0.048  |                       |         |
| 1843 | 460402307 | 29 Kda Ribonucleoprotein A                                        | 819          | 31491              | 39491              | 4.67             | 4.67             | 34       | 13              | 57.2       | 6.67        |                 |        | -1.64                 | 0.026   |
| 1906 | 6634469   | Putative Ascorbate Peroxidase (TI29)                              | 730          | 37898              | 36531              | 8.27             | 9.22             | 27       | 15              | 47.2       | 5.04        |                 |        | -3.45                 | 0.025   |
| 1907 | 6634469   | Putative Ascorbate Peroxidase (TI29)                              | 572          | 37898              | 36531              | 8.27             | 9.27             | 24       | 10              | 29.6       | 2.11        |                 |        |                       |         |
| 1972 | 460401859 | Uracil Phosphoribosyltransferase-Like Isoform 1                   | 232          | 31657              | 33716              | 8.54             | 7.35             | 4        | 4               | 17.1       | 0.57        |                 |        | -2.13                 | 0.02    |
|      | 56562177  | Carbonic Anhydrase                                                | 163          | 34845              | 33716              | 6.67             | 7.35             | 5        | 4               | 15.9       | 0.36        |                 |        |                       |         |
| 1976 | 56562177  | Carbonic Anhydrase                                                | 430          | 34845              | 33825              | 6.67             | 7.96             | 13       | 10              | 34.9       | 1.05        |                 |        | -1.75                 | 0.044   |
| 1977 | 460412635 | 20 Kda Chaperonin                                                 | 848          | 26626              | 33862              | 8.55             | 6.65             | 51       | 14              | 61.9       | 8.64        |                 |        | -1.96                 | 0.0005  |
| 1980 | 460412635 | 20 Kda Chaperonin                                                 | 300          | 26626              | 33825              | 8.55             | 6.72             | 12       | 6               | 24.2       | 1.22        |                 |        | -1.56                 | 0.043   |
| 1982 | 56562177  | Carbonic Anhydrase                                                | 526          | 34845              | 33789              | 6.67             | 7.85             | 14       | 8               | 35.8       | 1.79        |                 |        | -3.38                 | 0.032   |
| 1983 | 56562177  | Carbonic Anhydrase                                                | 553          | 34845              | 33862              | 6.67             | 8.07             | 15       | 12              | 42.4       | 2.09        |                 |        | -3.54                 | 0.023   |
| 1985 | 56562177  | Carbonic Anhydrase                                                | 406          | 34845              | 34009              | 6.67             | 8.62             | 9        | 9               | 35.5       | 1.27        |                 |        | -5.79                 | 0.024   |
| 1989 | 56562177  | Carbonic Anhydrase                                                | 661          | 34845              | 33862              | 6.67             | 8.16             | 29       | 12              | 44.5       | 3.21        |                 |        | -6.13                 | 0.0076  |
| 1991 | 56562177  | Carbonic Anhydrase                                                | 407          | 34845              | 33899              | 6.67             | 8.34             | 8        | 8               | 29.9       | 1.05        |                 |        | -8.07                 | 0.011   |
| 1992 | 56562177  | Carbonic Anhydrase                                                | 534          | 34845              | 33899              | 6.67             | 8.40             | 11       | 8               | 28.7       | 1.52        |                 |        | -10.18                | 0.015   |
| 1993 | 56562177  | Carbonic Anhydrase                                                | 487          | 34845              | 34046              | 6.67             | 8.46             | 13       | 10              | 38.9       | 1.79        |                 |        | -5.63                 | 0.04    |
| 1736 | 460367599 | 50S Ribosomal Protein L1                                          | 582          | 37092              | 41156              | 9.32             | 9.71             | 14       | 13              | 36.1       | 1.89        |                 |        | 2.45                  | 0.018   |
| 2052 | 460368630 | Upf0603 Protein At1G54780                                         | 111          | 31745              | 31286              | 6.85             | 5.69             | 3        | 3               | 12.1       | 0.4         |                 |        | -1.9                  | 0.014   |
|      | 115803    | Chlorophyll A-B Binding Protein 4                                 | 86           | 28984              | 31286              | 5.33             | 5.69             | 2        | 2               | 11.7       | 0.28        |                 |        |                       |         |
| 2057 | 460414390 | Atp Synthase Delta Chain                                          | 126          | 27315              | 31422              | 8.9              | 5.13             | 2        | 2               | 9.2        | 0.14        |                 |        | -1.61                 | 0.018   |
| 2060 | 460414390 | Atp Synthase Delta Chain                                          | 417          | 27315              | 31286              | 8.9              | 5.37             | 15       | 6               | 33.6       | 1.83        |                 |        | -1.59                 | 0.033   |
| 2125 | 460414390 | Atp Synthase Delta Chain                                          | 578          | 27315              | 30089              | 8.9              | 5.38             | 25       | 7               | 35.6       | 2.67        |                 |        | -1.66                 | 0.016   |
| 2046 | 19317     | Photosystem Ii 23 Kda Protein                                     | 252          | 27946              | 31627              | 8.26             | 6.14             | 6        | 6               | 25.6       | 0.89        | 1.63            | 0.054  |                       |         |
| 2116 | 19317     | Photosystem Ii 23 Kda Protein                                     | 409          | 27946              | 30351              | 8.26             | 5.59             | 12       | 9               | 31         | 1.43        | 2.24            | 0.041  |                       |         |
| 2140 | 19317     | Photosystem Ii 23 Kda Protein                                     | 720          | 27946              | 29317              | 8.26             | 6.06             | 34       | 14              | 45         | 8.86        | 1.76            | 0.027  |                       |         |
| 2141 | 19317     | Photosystem Ii 23 Kda Protein                                     | 548          | 27946              | 29412              | 8.26             | 6.16             | 31       | 12              | 50         | 5.73        | 1.81            | 0.033  |                       |         |
| 2142 | 19317     | Photosystem Ii 23 Kda Protein                                     | 683          | 27946              | 29317              | 8.26             | 5.94             | 32       | 13              | 45         | 4.93        | 1.69            | 0.053  |                       |         |
| 2144 | 19317     | Photosystem Ii 23 Kda Protein                                     | 615          | 27946              | 29222              | 8.26             | 5.59             | 19       | 12              | 47.7       | 4.93        | 2.13            | 0.0048 |                       |         |
| 2146 | 19317     | Photosystem Ii 23 Kda Protein                                     | 711          | 27946              | 29348              | 8.26             | 5.82             | 69       | 12              | 42.6       | 10.19       | 1.76            | 0.036  |                       |         |

| Spot | NCBI code | Description                                                               | Mascot Score | Mass <sub>th</sub> | Mass <sub>ex</sub> | pI <sub>th</sub> | pI <sub>ex</sub> | Peptides | Unique Peptides | Coverage % | emPAI score | Drought Vs Cntr |        | Drought Rw Vs Cntr Rw |         |
|------|-----------|---------------------------------------------------------------------------|--------------|--------------------|--------------------|------------------|------------------|----------|-----------------|------------|-------------|-----------------|--------|-----------------------|---------|
|      |           |                                                                           |              |                    |                    |                  |                  |          |                 |            |             | Ratio           | T-test | Ratio                 | T-test  |
| 2153 | 460407194 | Elongation Factor P-Like                                                  | 238          | 25499              | 28813              | 8.25             | 7.10             | 6        | 5               | 32.3       | 1.3         | 1.73            | 0.029  |                       |         |
| 2203 | 460400427 | Thylakoid Lumenal Protein At1G12250                                       | 374          | 33826              | 26277              | 9.27             | 5.94             | 5        | 5               | 23         | 0.7         |                 |        | -1.82                 | 0.045   |
|      | 460367516 | Thylakoid Lumenal 19 Kda Protein                                          | 310          | 26103              | 26277              | 5.96             | 5.94             | 9        | 6               | 17.8       | 1.26        |                 |        |                       |         |
| 2215 | 460405820 | 30S Ribosomal Protein S10                                                 | 196          | 20831              | 26135              | 9.15             | 9.37             | 4        | 4               | 21.3       | 0.96        |                 |        |                       |         |
| 2257 | 460365069 | Peptidyl-Prolyl Cis-Trans Isomerase Cyp20-2                               | 464          | 26690              | 26190              | 9.2              | 9.10             | 10       | 9               | 40.7       | 1.54        |                 |        |                       |         |
| 2341 | 84371989  | Atp Synthase Cfl Epsilon Subunit                                          | 531          | 14571              | 22824              | 5.43             | 6.78             | 16       | 10              | 63.2       | 12.75       | -2.25           | 0.022  |                       |         |
| 2342 | 84371989  | Atp Synthase Cfl Epsilon Subunit                                          | 305          | 14571              | 22824              | 5.43             | 6.88             | 9        | 5               | 37.6       | 4.3         | -1.97           | 0.0072 |                       |         |
| 2346 | 84371989  | Atp Synthase Cfl Epsilon Subunit                                          | 529          | 14571              | 22824              | 5.43             | 6.54             | 60       | 9               | 63.2       | 27.1        | -1.69           | 0.0096 | -2.78                 | 0.033   |
| 2348 | 84371989  | Atp Synthase Cfl Epsilon Subunit                                          | 430          | 14571              | 22849              | 5.43             | 6.64             | 30       | 7               | 60.9       | 7.54        | -1.81           | 0.012  | -3.16                 | 0.022   |
| 2349 | 84371989  | Atp Synthase Cfl Epsilon Subunit                                          | 417          | 14571              | 22799              | 5.43             | 6.70             | 15       | 6               | 48.9       | 9.83        | -1.99           | 0.01   |                       |         |
| 2339 | 84371989  | Atp Synthase Cfl Epsilon Subunit                                          | 359          | 14571              | 22874              | 5.43             | 6.93             | 10       | 8               | 62.4       | 4.3         | -1.92           | 0.0067 |                       |         |
| 2363 | 51457944  | Photosystem Ii Oxygen-Evolving Complex Protein 3                          | 282          | 24557              | 22432              | 9.64             | 9.52             | 20       | 5               | 25.7       | 1.38        | 1.84            | 0.028  |                       |         |
| 2394 | 51457944  | Photosystem Ii Oxygen-Evolving Complex Protein 3                          | 607          | 24557              | 21573              | 9.64             | 9.51             | 36       | 28              | 49.7       | 6.55        | 2.47            | 0.048  |                       |         |
| 2397 | 51457944  | Photosystem Ii Oxygen-Evolving Complex Protein 3                          | 285          | 24557              | 21597              | 9.64             | 9.61             | 7        | 5               | 28.7       | 1.06        | 2.09            | 0.0054 |                       |         |
| 2433 | 51457944  | Photosystem Ii Oxygen-Evolving Complex Protein 3                          | 176          | 24557              | 20636              | 9.64             | 9.50             | 5        | 4               | 20.9       | 0.33        | 1.96            | 0.0086 |                       |         |
| 2459 | 460397342 | Thioredoxin M4                                                            | 145          | 19843              | 19004              | 8.62             | 5.84             | 3        | 3               | 16.5       | 0.7         |                 |        | -3.19                 | 0.031   |
| 2505 | 19334     | Ribulose 1.5-Bisphosphate Carboxylase/Oxygenase                           | 237          | 20446              | 17827              | 6.73             | 6.48             | 18       | 4               | 28.9       | 3.71        |                 |        | -5.99                 | 0.018   |
| 2509 | 19334     | Ribulose 1.5-Bisphosphate Carboxylase/Oxygenase                           | 283          | 20446              | 17750              | 6.73             | 6.28             | 38       | 5               | 32.2       | 4.6         |                 |        | -6.21                 | 0.0051  |
| 2511 | 19334     | Ribulose 1.5-Bisphosphate Carboxylase/Oxygenase                           | 541          | 20446              | 17731              | 6.73             | 6.03             | 53       | 10              | 48.9       | 12.25       |                 |        | -5.42                 | 0.0059  |
| 2513 | 19334     | Ribulose 1.5-Bisphosphate Carboxylase/Oxygenase                           | 253          | 20446              | 17712              | 6.73             | 6.41             | 11       | 5               | 32.2       | 2.34        |                 |        | -5.39                 | 0.029   |
| 2515 | 19334     | Ribulose 1.5-Bisphosphate Carboxylase/Oxygenase                           | 296          | 20446              | 17750              | 6.73             | 5.71             | 34       | 6               | 35.6       | 4.6         |                 |        | -4.19                 | 0.021   |
| 2506 | 19334     | Ribulose 1.5-Bisphosphate Carboxylase/Oxygenase                           | 427          | 20446              | 17827              | 6.73             | 5.84             | 16       | 9               | 45.9       | 6.82        |                 |        | -3.93                 | 0.00097 |
| 2516 | 19334     | Ribulose 1.5-Bisphosphate Carboxylase/Oxygenase                           | 380          | 20446              | 17559              | 6.73             | 5.49             | 33       | 8               | 45.9       | 6.82        |                 |        | -3.59                 | 0.0094  |
| 2555 | 19300     | Plastocyanin                                                              | 182          | 17039              | 17039              | 5.06             | 5.06             | 9        | 3               | 27.1       | 2.41        |                 |        | -2.22                 | 0.0035  |
| 2005 | 7331143   | Chaperonin 21 Precursor                                                   | 199          | 26603              | 33244              | 6.85             | 5.68             | 4        | 4               | 19         | 0.7         |                 |        |                       |         |
| 2008 | 7331143   | Chaperonin 21 Precursor                                                   | 419          | 26603              | 33136              | 6.85             | 5.59             | 7        | 7               | 37.5       | 1.54        |                 |        |                       |         |
| 2375 | 460365655 | Phosphatidylglycerol/Phosphatidylinositol Transfer Protein-Like Isoform 1 | 99           | 22075              | 22022              | 5.92             | 7.76             | 3        | 2               | 7.7        | 0.61        | 2.35            | 0.019  |                       |         |
| 2468 | 460365655 | Phosphatidylglycerol/Phosphatidylinositol Transfer Protein-Like Isoform 1 | 132          | 22075              | 19253              | 5.92             | 7.75             | 2        | 2               | 13.8       | 0.38        |                 |        | 4.03                  | 0.044   |
| 1760 | 460387893 | Chlorophyll B Reductase Nol                                               | 138          | 38712              | 40889              | 9.22             | 9.20             | 3        | 3               | 9.1        | 0.32        | 1.7             | 0.001  |                       |         |
| 1793 | 460387893 | Chlorophyll B Reductase Nol                                               | 88           | 38712              | 39624              | 9.22             | 9.49             | 2        | 2               | 7.7        | 0.1         |                 |        | 1.62                  | 0.02    |
| 2421 | 38231570  | Pii-Like Protein                                                          | 177          | 21775              | 20974              | 9.33             | 6.55             | 5        | 4               | 22.6       | 0.91        | -1.61           | 0.013  | -2.61                 | 0.006   |
| 2409 | 75266239  | Constitutive Plastid-Lipid Associated Protein                             | 193          | 20056              | 21203              | 8.81             | 5.85             | 4        | 4               | 25.7       | 1.01        |                 |        | -1.62                 | 0.022   |
| 2411 | 75266239  | Constitutive Plastid-Lipid Associated Protein                             | 160          | 20056              | 21203              | 8.81             | 5.76             | 4        | 3               | 13.9       | 0.69        |                 |        | -2.02                 | 0.033   |
| 2412 | 19193     | Superoxide Dismutase [Cu-Zn]                                              | 198          | 22328              | 21065              | 5.77             | 6.29             | 5        | 3               | 22.1       | 0.88        |                 |        | -2.12                 | 0.0015  |
| 2386 | 460378455 | Thylakoid Lumenal 17.4 Kda Protein                                        | 126          | 25712              | 21832              | 6.71             | 5.26             | 2        | 2               | 10.3       | 0.32        |                 |        | -1.91                 | 0.049   |
| 2396 | 460397890 | Peptidyl-Prolyl Cis-Trans Isomerase Fkbp13                                | 115          | 24353              | 21597              | 8.69             | 9.25             | 2        | 2               | 6.6        | 0.34        | 1.77            | 0.048  |                       |         |
| 2049 | 15485610  | Clp Protease 2 Proteolytic Subunit                                        | 302          | 32577              | 31834              | 8.78             | 6.64             | 7        | 6               | 24.1       | 0.73        |                 |        | 1.69                  | 0.0052  |
| 2084 | 84372035  | Photosystem I Subunit Vii                                                 | 148          | 9545               | 30983              | 6.67             | 7.26             | 3        | 3               | 39.5       | 1.88        | 1.87            | 0.04   |                       |         |
| 2095 | 84372035  | Photosystem I Subunit Vii                                                 | 125          | 9545               | 30483              | 6.67             | 9.08             | 2        | 2               | 9.5        | 1.03        | 2.33            | 0.043  |                       |         |
| 2099 | 460396303 | Auxin-Binding Protein Abp19A-Like                                         | 147          | 22188              | 30417              | 6.25             | 8.23             | 2        | 2               | 32.1       | 0.37        |                 |        |                       |         |
| 2104 | 84372035  | Photosystem I Subunit Vii                                                 | 133          | 9545               | 30384              | 6.67             | 9.12             | 2        | 2               | 32.1       | 1.03        | 2.19            | 0.016  |                       |         |
| 2105 | 84372035  | Photosystem I Subunit Vii                                                 | 196          | 9545               | 30384              | 6.67             | 9.16             | 3        | 3               | 39.5       | 1.88        | 2.47            | 0.019  |                       |         |
| 2139 | 84372035  | Photosystem I Subunit Vii                                                 | 109          | 9545               | 29540              | 6.67             | 7.97             | 2        | 2               | 32.1       | 1.03        | 3.00            | 0.062  |                       |         |
| 2023 | 19182     | Type Iii Chlorophyll A/B-Binding Protein                                  | 202          | 29344              | 32566              | 8.96             | 7.41             | 5        | 5               | 20.1       | 0.28        | 1.55            | 0.065  |                       |         |
| 2041 | 460392422 | Psbp Domain-Containing Protein 6                                          | 125          | 27450              | 31937              | 8.35             | 8.06             | 3        | 3               | 16         | 0.48        |                 |        | 2.03                  | 0.024   |
| 2075 | 19182     | Type Iii Chlorophyll A/B-Binding Protein                                  | 127          | 29344              | 30983              | 8.96             | 7.15             | 3        | 3               | 13.2       | 0.28        | 2.25            | 0.028  |                       |         |
| 2091 | 460392422 | Psbp Domain-Containing Protein 6                                          | 84           | 27450              | 30815              | 8.35             | 7.81             | 2        | 2               | 12         | 0.3         | 1.96            | 0.06   |                       |         |
